# Supplementary material for: Quality of chronic kidney disease management in primary care: a retrospective study
Source: PubMed Central journal article supplement — Scand J Prim Health Care. 2016 Feb 3;34(1):73–80. doi: 10.3109/02813432.2015.1132885 (PMC4911031; doi:10.3109/02813432.2015.1132885), 2016-02-03
Supplement: IPRI1132885_SM6538.pdf [file IPRI1132885_SM6538.pdf]

**Web-appendices**

**Web-appendix table 1. CKD management recommendations provided by the interdisciplinary CKD-guideline for primary care and nephrology.**

|                                                 | <i>Annual monitoring of disease progression</i> |                  |                    |                   | <i>Annual monitoring of metabolic parameters</i> |         |           |     |                  |           |
|-------------------------------------------------|-------------------------------------------------|------------------|--------------------|-------------------|--------------------------------------------------|---------|-----------|-----|------------------|-----------|
|                                                 | eGFR                                            | albumin<br>urine | fasting<br>glucose | blood<br>pressure | hemoglobin                                       | calcium | phosphate | PTH | serum<br>albumin | potassium |
| <b>Patients ≥ 65 years</b>                      |                                                 |                  |                    |                   |                                                  |         |           |     |                  |           |
| eGFR ≥ 60 and<br>microalbuminuria               | •                                               | •                | •                  | •                 |                                                  |         |           |     |                  |           |
| eGFR 45 – 60 and<br>normo- or micro-albuminuria | •                                               | •                | •                  | •                 |                                                  |         |           |     |                  |           |
| eGFR 30 – 45 and<br>normo- or micro-albuminuria | •                                               | •                | •                  | •                 | •                                                | •       | •         | •   | •                | •         |
| eGFR < 30 and<br>normo- or micro-albuminuria    | •                                               | •                | •                  | •                 | •                                                | •       | •         | •   | •                | •         |
| eGFR any and<br>macroalbuminuria                | •                                               | •                | •                  | •                 | •                                                | •       | •         | •   | •                | •         |
| <b>Patients &lt; 65 years</b>                   |                                                 |                  |                    |                   |                                                  |         |           |     |                  |           |
| eGFR ≥ 60 and<br>microalbuminuria               | •                                               | •                | •                  | •                 |                                                  |         |           |     |                  |           |

|                                                 |   |   |   |   |   |   |   |   |   |   |
|-------------------------------------------------|---|---|---|---|---|---|---|---|---|---|
| eGFR 45 – 60 and<br>normo- or micro-albuminuria | • | • | • | • | • | • | • | • | • | • |
| eGFR 30 – 45 and<br>normo- or micro-albuminuria | • | • | • | • | • | • | • | • | • | • |
| eGFR < 30 and<br>normo- or micro-albuminuria    | • | • | • | • | • | • | • | • | • | • |
| eGFR any and<br>macroalbuminuria                | • | • | • | • | • | • | • | • | • | • |

*'primary care group': treatment in primary care. 'consultation group': consultation of a nephrologist without referral. 'referral group': referral to secondary care. eGFR in ml/min/1.73m<sup>2</sup>*

**Web-appendix table 2. Practice characteristics**

| <b>Practice type</b>         | <b>N</b> |
|------------------------------|----------|
| Solo practice                | 6        |
| Duo practice                 | 16       |
| Group practice               | 25       |
| Vocational training practice | 30       |
| Rural location               | 15       |
| General Practice             |          |
| Information System           |          |
| Medicom                      | 25       |
| Micro-HIS                    | 6        |
| MIRA                         | 6        |
| Promedico ASP                | 8        |
| Promedico VDF                | 2        |

**Web-appendix table 3a. Classification of included CDK patients with diabetes under care of their GP using the interdisciplinary CKD-guideline for primary care and nephrology.**

|                                         | Albuminuria |        |                  |                  |
|-----------------------------------------|-------------|--------|------------------|------------------|
|                                         | Not known   | Normal | Microalbuminuria | Macroalbuminuria |
| <b>Patients ≥ 65 years (n = 2.164)</b>  |             |        |                  |                  |
| eGFR ≥ 60                               |             |        | 559              | 44               |
| eGFR 45 – 60                            | 133         | 690    | 253              | 27               |
| eGFR 30 – 45                            | 76          | 214    | 127              | 14               |
| eGFR < 30                               | 6           | 9      | 10               | 2                |
| <b>Patients &lt; 65 years (n = 729)</b> |             |        |                  |                  |
| eGFR ≥ 60                               |             |        | 418              | 22               |
| eGFR 45 – 60                            | 46          | 186    | 31               | 4                |
| eGFR 30 – 45                            | 5           | 8      | 6                | 2                |
| eGFR < 30                               | 1           | 0      | 0                | 0                |

Classification of patients based on renal function, albuminuria and age. 'primary care group' n=2.053: treatment in primary care. 'consultation group' n=680: consultation of a nephrologist without referral. 'referral group' n=160: referral to secondary care. eGFR in ml/min/1.73m<sup>2</sup>

**Web-appendix table 3b. Classification of included CKD patients without diabetes under care of their GP using the interdisciplinary CKD-guideline for primary care and nephrology.**

|                                           | Albuminuria |        |                  |                  |
|-------------------------------------------|-------------|--------|------------------|------------------|
|                                           | Not known   | Normal | Microalbuminuria | Macroalbuminuria |
| <b>Patients ≥ 65 years (n = 4.281)</b>    |             |        |                  |                  |
| eGFR ≥ 60                                 |             |        | 333              | 11               |
| eGFR 45 – 60                              | 1950        | 941    | 158              | 7                |
| eGFR 30 – 45                              | 533         | 221    | 64               | 7                |
| eGFR < 30                                 | 46          | 5      | 3                | 2                |
| <b>Patients &lt; 65 years (n = 1.620)</b> |             |        |                  |                  |
| eGFR ≥ 60                                 |             |        | 275              | 10               |
| eGFR 45 – 60                              | 817         | 428    | 37               | 3                |
| eGFR 30 – 45                              | 31          | 12     | 1                | 0                |
| eGFR < 30                                 | 2           | 2      | 1                | 1                |

Classification of patients based on renal function, albuminuria and age. 'primary care group' n=3.657: treatment in primary care. 'consultation group' n=2.100: consultation of a nephrologist without referral. 'referral group' n=144: referral to secondary care. eGFR in ml/min/1.73m<sup>2</sup>

**Web-appendix table 4a. Performance on process- and outcome indicators for CKD patients with diabetes, within 15 months prior to data extraction.**

| Patient group                                   | N    | Monitoring of disease progression |                  |                    |                   |                 | Monitoring of metabolic complications |         |                |     |                  |           |            | Recog-<br>nition | Blood pressure<br>targets * |                 |                |
|-------------------------------------------------|------|-----------------------------------|------------------|--------------------|-------------------|-----------------|---------------------------------------|---------|----------------|-----|------------------|-----------|------------|------------------|-----------------------------|-----------------|----------------|
|                                                 |      | renal<br>function                 | albu-<br>minuria | Fasting<br>glucose | blood<br>pressure | complete        | hemo-<br>globin                       | calcium | phos-<br>phate | PTH | serum<br>albumin | potassium | complete   |                  | <140/90<br>mmHg             | <130/80<br>mmHg |                |
| <i>Primary care group</i>                       |      |                                   |                  |                    |                   |                 |                                       |         |                |     |                  |           |            |                  |                             |                 |                |
| Age ≥ 65 eGFR<br>≥ 60 and micro-<br>albuminuria | 559  | 519                               | 500              | 526                | 504               | 462<br>(83%)    |                                       |         |                |     |                  |           |            |                  |                             | 182<br>(36%)    | 67<br>(13%)    |
| Age < 65 eGFR<br>≥ 60 and micro-<br>albuminuria | 418  | 368                               | 352              | 369                | 340               | 307<br>(73%)    |                                       |         |                |     |                  |           |            |                  |                             | 159<br>(47%)    | 55<br>(16%)    |
| Age ≥ 65 eGFR<br>45 – 60                        | 1076 | 1000                              | 849              | 961                | 945               | 792<br>(74%)    |                                       |         |                |     |                  |           |            |                  | 335<br>(31%)                | 429<br>(45%)    | 195<br>(21%)   |
| <b>Total<br/>primary care</b>                   | 2053 | 1887<br>(91.9%)                   | 1701<br>(82.9%)  | 1856<br>(90.4%)    | 1789<br>(87.1%)   | 1561<br>(76.0%) |                                       |         |                |     |                  |           |            |                  |                             | 770<br>(43.0%)  | 317<br>(17.7%) |
| <i>Consultation group</i>                       |      |                                   |                  |                    |                   |                 |                                       |         |                |     |                  |           |            |                  |                             |                 |                |
| Age ≥ 65<br>eGFR 30 – 45                        | 417  | 371                               | 283              | 341                | 344               | 269<br>(65%)    | 209                                   | 64      | 53             | 26  | 44               | 310       | 18<br>(4%) | 259<br>(62%)     | 188<br>(55%)                | 88<br>(26%)     |                |

|                               |     |                |                |                |                |                |                |               |              |              |              |                |              |                |                |                |
|-------------------------------|-----|----------------|----------------|----------------|----------------|----------------|----------------|---------------|--------------|--------------|--------------|----------------|--------------|----------------|----------------|----------------|
| Age < 65<br>eGFR 45 – 60      | 263 | 228            | 190            | 212            | 204            | 169<br>(64%)   | 77             | 15            | 11           | 3            | 8            | 173            | 2<br>(1%)    | 58<br>(22%)    | 100<br>(49%)   | 37<br>(18%)    |
| <b>Total<br/>consultation</b> | 680 | 599<br>(88.1%) | 473<br>(69.6%) | 553<br>(81.3%) | 548<br>(80.6%) | 438<br>(64.4%) | 286<br>(42.1%) | 79<br>(11.6%) | 64<br>(9.4%) | 29<br>(4.3%) | 52<br>(7.6%) | 483<br>(71.0%) | 20<br>(2.9%) | 317<br>(46.6%) | 288<br>(52.6%) | 125<br>(22.8%) |
| <i>Referral group</i>         |     |                |                |                |                |                |                |               |              |              |              |                |              |                |                |                |
| Age ≥ 65 eGFR<br>< 30         | 25  | 23             | 13             | 17             | 17             | 12<br>(48%)    | 16             | 5             | 2            | 0            | 2            | 21             | 0<br>(0%)    | 18<br>(72%)    | 7<br>(41%)     | 6<br>(35%)     |
| Age < 65 eGFR<br>30 – 45      | 19  | 16             | 14             | 17             | 14             | 12<br>(63%)    | 11             | 6             | 5            | 1            | 2            | 17             | 1<br>(5%)    | 10<br>(53%)    | 7<br>(50%)     | 5<br>(36%)     |
| Age < 65 eGFR<br>< 30         | 1   | 0              | 0              | 0              | 0              | 0<br>(0%)      | 0              | 0             | 0            | 0            | 0            | 0              | 0<br>(0%)    | 0<br>(0%)      | 0<br>(0%)      | 0<br>(0%)      |
| Macro-<br>albuminuria         | 115 | 105            | 91             | 107            | 100            | 84<br>(73%)    | 43             | 13            | 5            | 3            | 8            | 88             | 1<br>(1%)    | 16**<br>(33%)  | 27<br>(27%)    | 13<br>(13%)    |
| <b>Total<br/>referral</b>     | 160 | 144<br>(90.0%) | 118<br>(73.8%) | 141<br>(88.1%) | 131<br>(81.9%) | 108<br>(67.5%) | 70<br>(43.8%)  | 24<br>(15.0%) | 12<br>(7.5%) | 4<br>(2.5%)  | 12<br>(7.5%) | 126<br>(78.8%) | 2<br>(1.3%)  | 44<br>(46.8%)  | 41<br>(31.3%)  | 24<br>(18.3%)  |

|                                                |      |                 |                 |                 |                 |                 |  |                |                |              |              |              |                |              |  |                       |                 |                |
|------------------------------------------------|------|-----------------|-----------------|-----------------|-----------------|-----------------|--|----------------|----------------|--------------|--------------|--------------|----------------|--------------|--|-----------------------|-----------------|----------------|
| <b>Total<br/>consultation<br/>and referral</b> | 840  | 743<br>(88.5%)  | 591<br>(70.4%)  | 694<br>(82.6%)  | 679<br>(80.8%)  | 546<br>(65.0%)  |  | 356<br>(42.4%) | 103<br>(12.3%) | 76<br>(9.0%) | 33<br>(3.9%) | 64<br>(7.6%) | 609<br>(72.5%) | 22<br>(2.6%) |  | 361<br>(46.6%)<br>)** | 329<br>(48.5%)  | 149<br>(21.9%) |
| <b>Total</b>                                   | 2893 | 2630<br>(90.9%) | 2292<br>(79.2%) | 2550<br>(88.1%) | 2468<br>(85.3%) | 2107<br>(72.8%) |  |                |                |              |              |              |                |              |  | 696<br>(37.6%)<br>)** | 1099<br>(44.5%) | 466<br>(18.9%) |

Process- and outcome indicators are derived from the interdisciplinary CKD-guideline for primary care and nephrology. For each indicator, performance in the preceding 15 months is shown. (Renal function: eGFR or serum creatinine; Albuminuria: albumin creatinine ratio or urine albumin). \* the percentages show the achieved blood pressure targets divided by the number of blood pressure measurements. \*\* Percentage calculated with patients with eGFR < 60 ml/min/1.73m<sup>2</sup> as denominator (n = 49 in macroalbuminuria group).



**Web-appendix table 4b. Performance on process- and outcome indicators for CKD patients without diabetes, within 15 months prior to data extraction.**

| Patient group                            | N    | Monitoring of disease progression |                 |                 |                 |                 | Monitoring of metabolic complications |         |           |     |               |           |          | Recognition  | Blood pressure targets* |                |
|------------------------------------------|------|-----------------------------------|-----------------|-----------------|-----------------|-----------------|---------------------------------------|---------|-----------|-----|---------------|-----------|----------|--------------|-------------------------|----------------|
|                                          |      | renal function                    | albuminuria     | Fasting glucose | blood pressure  | complete        | hemoglobin                            | calcium | phosphate | PTH | serum albumin | potassium | complete |              | <140/90 mmHg            | <130/80 mmHg   |
| <i>Primary care group</i>                |      |                                   |                 |                 |                 |                 |                                       |         |           |     |               |           |          |              |                         |                |
| Age ≥ 65 eGFR ≥ 60 and micro-albuminuria | 333  | 298                               | 263             | 269             | 272             | 214<br>(64%)    |                                       |         |           |     |               |           |          |              | 83<br>(31%)             | 23<br>(8%)     |
| Age < 65 eGFR ≥ 60 and micro-albuminuria | 275  | 220                               | 203             | 196             | 192             | 148<br>(54%)    |                                       |         |           |     |               |           |          |              | 90<br>(47%)             | 29<br>(15%)    |
| Age ≥ 65 eGFR 45 – 60                    | 3049 | 2403                              | 837             | 1612            | 2058            | 737<br>(24%)    |                                       |         |           |     |               |           |          | 753<br>(25%) | 805<br>(39%)            | 283<br>(14%)   |
| <b>Total primary care</b>                | 3657 | 2921<br>(79.9%)                   | 1303<br>(35.6%) | 2077<br>(56.8%) | 2522<br>(69.0%) | 1099<br>(30.1%) |                                       |         |           |     |               |           |          |              | 978<br>(38.8%)          | 335<br>(13.3%) |
| <i>Consultation group</i>                |      |                                   |                 |                 |                 |                 |                                       |         |           |     |               |           |          |              |                         |                |

|                               |      |                 |                |                |                 |                |                 |                |               |              |               |                 |              |                |                |                |
|-------------------------------|------|-----------------|----------------|----------------|-----------------|----------------|-----------------|----------------|---------------|--------------|---------------|-----------------|--------------|----------------|----------------|----------------|
| Age ≥ 65<br>eGFR 30 – 45      | 818  | 652             | 218            | 362            | 548             | 182<br>(22%)   | 487             | 130            | 106           | 49           | 80            | 562             | 33<br>(4%)   | 462<br>(57%)   | 239<br>(44%)   | 108<br>(20%)   |
| Age < 65<br>eGFR 45 – 60      | 1282 | 903             | 350            | 632            | 703             | 278<br>(22%)   | 568             | 81             | 63            | 29           | 41            | 643             | 17<br>(1%)   | 266<br>(21%)   | 365<br>(52%)   | 112<br>(16%)   |
| <b>Total<br/>consultation</b> | 2100 | 1555<br>(74.0%) | 568<br>(27.0%) | 994<br>(47.3%) | 1251<br>(59.6%) | 460<br>(21.9%) | 1055<br>(50.2%) | 211<br>(10.0%) | 169<br>(8.0%) | 78<br>(3.7%) | 121<br>(5.8%) | 1205<br>(57.4%) | 50<br>(2.4%) | 728<br>(34.7%) | 604<br>(48.3%) | 220<br>(17.6%) |
| <i>Referral group</i>         |      |                 |                |                |                 |                |                 |                |               |              |               |                 |              |                |                |                |
| Age ≥ 65 eGFR<br>< 30         | 54   | 44              | 5              | 18             | 31              | 4<br>(7%)      | 42              | 15             | 11            | 2            | 11            | 38              | 1<br>(2%)    | 29<br>(54%)    | 17<br>(55%)    | 12<br>(39%)    |
| Age < 65 eGFR<br>30 – 45      | 44   | 33              | 6              | 21             | 24              | 4<br>(9%)      | 25              | 8              | 6             | 1            | 6             | 22              | 1<br>(2%)    | 18<br>(41%)    | 16<br>(67%)    | 5<br>(21%)     |
| Age < 65 eGFR<br>< 30         | 5    | 3               | 0              | 1              | 1               | 0<br>(0%)      | 4               | 2              | 1             | 0            | 2             | 3               | 0<br>(0%)    | 3<br>(60%)     | 1<br>(100%)    | 1<br>(100%)    |
| Macro-<br>albuminuria         | 41   | 32              | 27             | 28             | 28              | 20<br>(49%)    | 17              | 6              | 5             | 0            | 4             | 29              | 0<br>(0%)    | 10<br>(50%)**  | 8<br>(29%)     | 0<br>(0%)      |
| <b>Total<br/>referral</b>     | 144  | 112<br>(77.8%)  | 38<br>(26.4%)  | 68<br>(47.2%)  | 84<br>(58.3%)   | 28<br>(19.4%)  | 88<br>(61.1%)   | 31<br>(21.5%)  | 23<br>(16.0%) | 3<br>(2.1%)  | 23<br>(16.0%) | 92<br>(63.9%)   | 2<br>(1.4%)  | 60<br>(48.8%)  | 42<br>(50.0%)  | 18<br>(21.4%)  |

|                                      |      |         |         |         |         |         | )       |         |        |        |        |         |        |         | **      |         |  |
|--------------------------------------|------|---------|---------|---------|---------|---------|---------|---------|--------|--------|--------|---------|--------|---------|---------|---------|--|
| <b>Total</b>                         | 2244 | 1667    | 606     | 1062    | 1335    | 488     | 1143    | 242     | 192    | 81     | 144    | 1297    | 52     | 788     | 646     | 238     |  |
| <b>consultation<br/>and referral</b> |      | (74.3%) | (27.0%) | (47.3%) | (59.5%) | (21.7%) | (50.9%) | (10.8%) | (8.6%) | (3.6%) | (6.4%) | (57.8%) | (2.3%) | (35.4%) | (48.4%) | (17.8%) |  |
|                                      |      |         |         |         |         |         | )       |         |        |        |        |         |        | **      |         |         |  |
| <b>Total</b>                         | 5901 | 4588    | 1909    | 3139    | 3857    | 1587    |         |         |        |        |        |         |        | 1541    | 1624    | 573     |  |
|                                      |      | (77.7%) | (32.4%) | (53.2%) | (65.4%) | (26.9%) |         |         |        |        |        |         |        | (29.2%) | (42.1%) | (14.9%) |  |
|                                      |      |         |         |         |         |         |         |         |        |        |        |         |        | **      |         |         |  |

Process- and outcome indicators are derived from the interdisciplinary CKD-guideline for primary care and nephrology. For each indicator, performance in the preceding 15 months is shown. (Renal function: eGFR or serum creatinine; Albuminuria: albumin creatinine ratio or urine albumin). \* the percentages show the achieved blood pressure targets divided by the number of blood pressure measurements. \*\* Percentage calculated with patients with eGFR < 60 ml/min/1.73m<sup>2</sup> as denominator (n = 20 in macroalbuminuria group).
